# Supplementary material for: Mechanical stretch promotes apoptosis and impedes ciliogenesis of primary human airway basal stem cells
Source: PubMed Central journal article supplement (PMC10540374; doi:10.1186/s12931-023-02528-w), 2023-09-29
Supplement: 12931_2023_2528_MOESM1_ESM.pdf [file 12931_2023_2528_MOESM1_ESM.pdf]

Supplementary materials

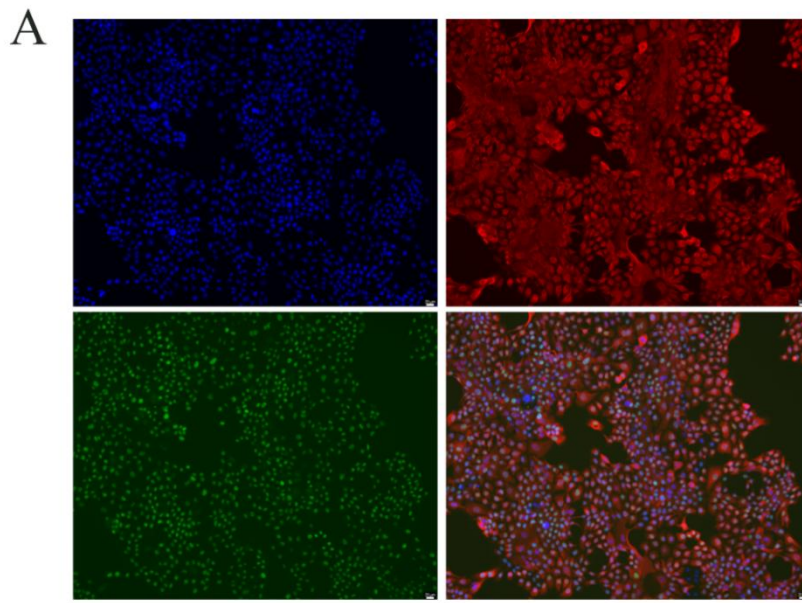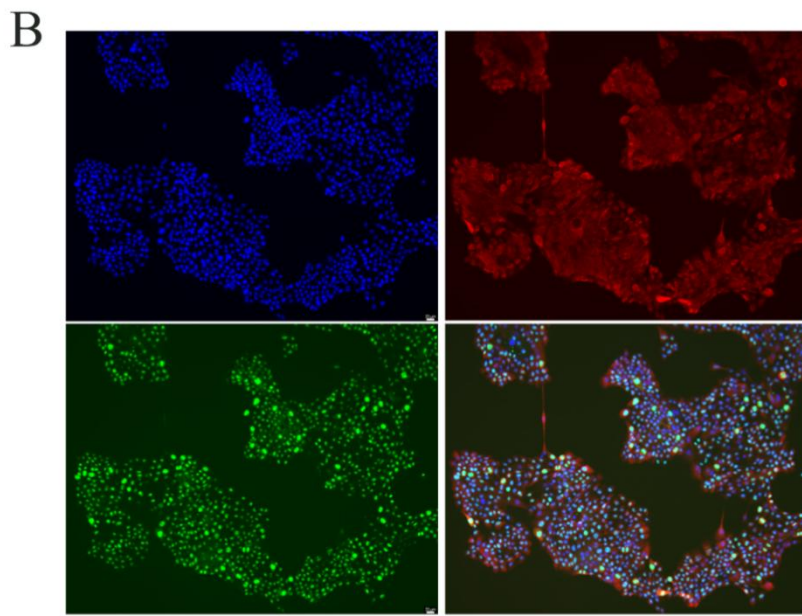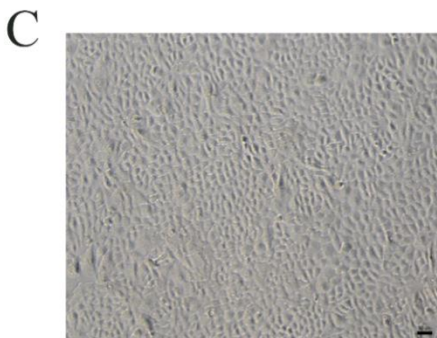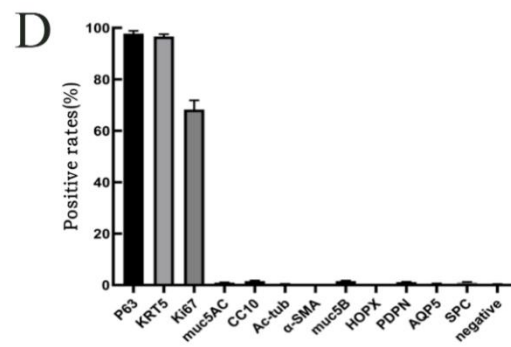

**Figure S1 Identification of primary human airway basal stem cells (ABSCs).** (A) ABSCs were stained with anti-tumor protein p63 (green), anti-keratin 5 (red), and DAPI (blue). (B) ABSCs were stained with anti-ki67(green), anti-keratin 5 (red), and DAPI (blue). (C) ABSCs presented structured and "slabstone"-like arrange under the microscope. (D) Over 90% of cells were positive for the markers of ABSCs in tumor protein p63 and anti-keratin 5. Over 60% of ABSCs were positive for the marker of proliferation ki67, and the expression of markers were negative in other types of epithelial cells. Scale bars represent 50um in (A), (B), and (C).

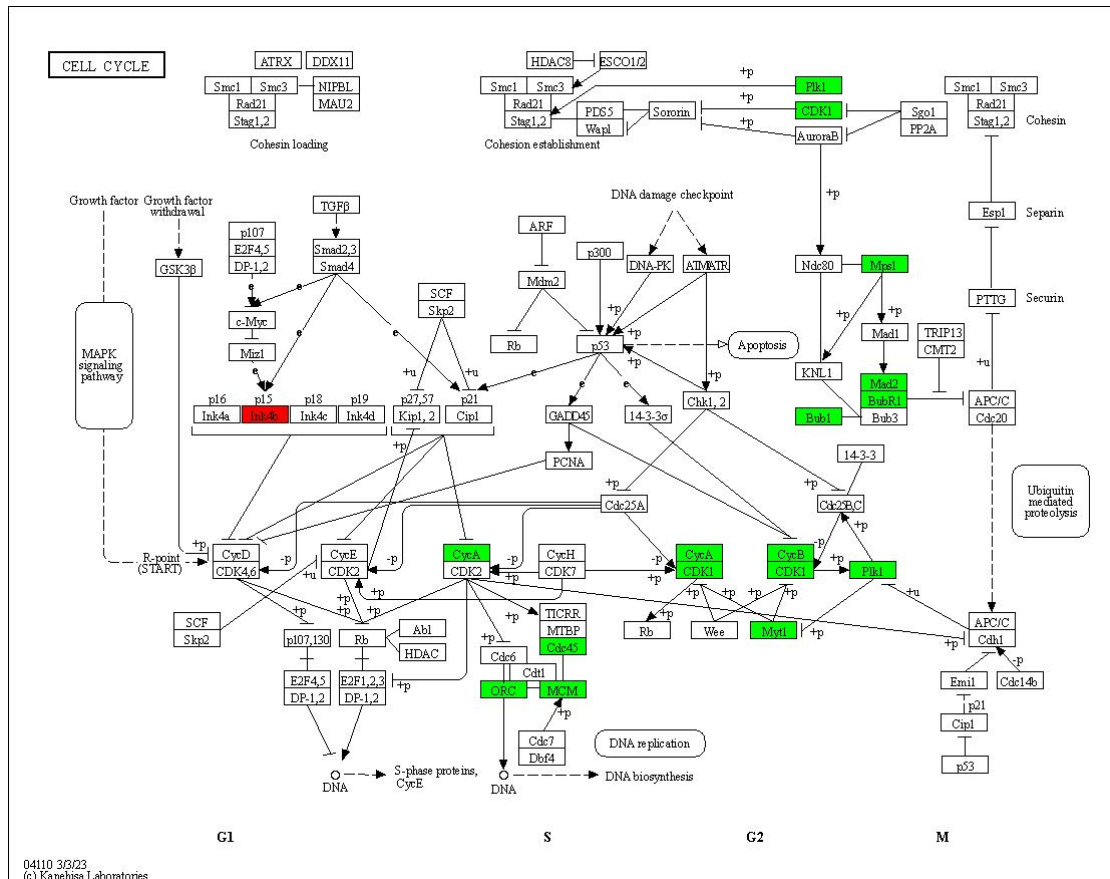

**Figure S2 The expression of differentially expressed genes in the cell cycle pathway with KEGG analysis.** The green box indicates the downregulated genes. The red box indicates the upregulated genes.

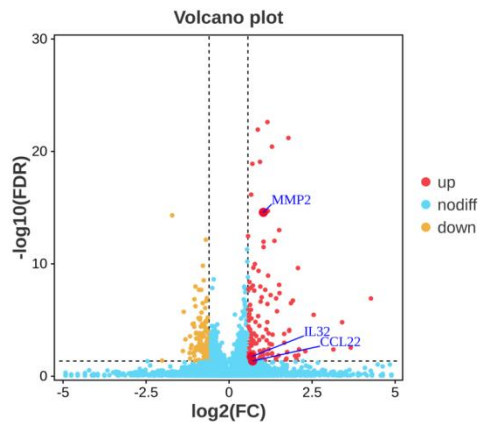

**Figure S3** The volcano analysis of DEGs with color-coded. *CCL22*, *IL32*, and *MMP2* are annotated in the volcano plot.

**Table S1** Primer sequences for RT- qPCR.

---

|            |                           |
|------------|---------------------------|
| MKI67-F    | CAAGAGGCAAATCATCCGAACCC   |
| MKI67-R    | TG TTCAGCTCTCCGCAGGT      |
| ADM-F      | GGTTTCCGTCGCCCTGATGTA     |
| ADM-R      | AGCCCACTTATTCCACTTCTTTTCG |
| CENPW-F    | TACTGGCCGCAGCAAAGGTA      |
| CENPW-R    | GTTACCACCCAAAAGAATGCATCA  |
| COL1A1-F   | AAAGATGGACTCAACGGTCTC     |
| COL1A1-R   | CATCGTGAGCCTTCTCTTGAG     |
| FN1-F      | AATAGATGCAACGATCAGGACA    |
| FN1-R      | GCAGGTTTCCTCGATTATCCTT    |
| RAD51AP1-F | TAATGCTTTGGTGACTTCGGT     |
| RAD51AP1-R | AGGACTGCGTATTTCTAATGGT    |
| SKA1-F     | TTGACCCAGTTCCTGACACA      |
| SKA1-R     | CTGAGTTATCCAGGTGCCCAT     |
| UCHL1-F    | GGCCAATGTCGGGTAGATGA      |
| UCHL1-R    | CATGGTTCACCGGAAAAGGC      |

---

**Table S2 The information of patients.**

| <b>Name</b> | <b>Sex</b> | <b>Age</b> | <b>Diagnosis</b>              | <b>Comorbidities</b> | <b>Treatment</b>           | <b>Pathological results</b>                            |
|-------------|------------|------------|-------------------------------|----------------------|----------------------------|--------------------------------------------------------|
| Patient 1   | Male       | 48         | Right lower pulmonary nodules | /                    | Minimally invasive surgery | Right lower lung granulomatous inflammation            |
| Patient 2   | Male       | 38         | Right lower pulmonary nodules | /                    | Minimally invasive surgery | Right lower lung adenocarcinoma in situ (0.7cm)        |
| Patient 3   | Female     | 37         | Right upper pulmonary nodules | /                    | Minimally invasive surgery | Right upper lung microinvasive adenocarcinomas (0.6cm) |
| Patient 4   | Male       | 55         | Right lower pulmonary nodules | /                    | Minimally invasive surgery | Right lower lung adenocarcinoma in situ (0.6cm)        |
